# Supplementary material for: Proof of concept: enthesitis and new bone formation in spondyloarthritis are driven by mechanical strain and stromal cells
Source: HighWire-hosted journal article supplement (doi:10.1136/annrheumdis-2013-203643), 2013-08-07

**Supplemental figure 1.** (A) Three-dimensional rendering of a micro-CT reconstruction of CAIA mouse with *VGStudio Max 2.0*. (B) Hind paw micro-CT image of non-tail suspended CAIA mouse after immersion in  $HgCl_2$  to visualize soft tissues. (C) Micro-CT image of tail suspended CAIA mouse. Arrows point at new bone formation at enthesal sites.

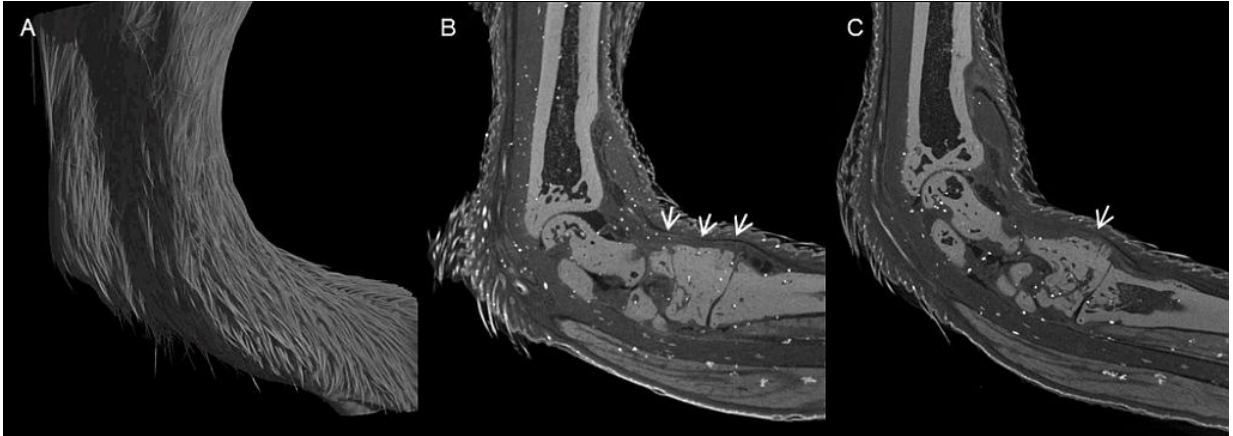

Supplement: annrheumdis-2013-203643supp_figures.pdf [file annrheumdis-2013-203643supp_figures.pdf]
